# Supplementary material for: Association between ACE and ACTN3 genes polymorphisms and athletic performance in elite and sub-elite Chinese youth male football players
Source: PeerJ. 2023 Mar 24;11:e14893. doi: 10.7717/peerj.14893 (PMC10042156; doi:10.7717/peerj.14893)
Supplement: Supplemental Information 2 [file peerj-11-14893-s002.xlsx]

## Sheet: Sheet1
序号	样本名	年龄	ACN3	ACE
1	C1-1	13	RR	II
2	C1-2	13	RX	II
3	C1-3	13	RR	II
4	C1-4	13	RX	ID
5	C1-5	13	RR	II
6	C1-6	13	RR	II
7	C1-7	13	RX	II
8	C1-8	13	RR	DD
9	C1-9	13	RX	ID
10	C1-10	13	RR	II
11	C1-11	13	RR	ID
12	C1-12	13	RX	II
13	C1-13	13	RX	II
14	C1-14	13	RR	ID
15	C1-15	13	RX	II
16	C1-16	13	RX	II
17	C1-17	13	XX	ID
18	C1-18	13	RX	ID
19	C1-19	13	XX	II
20	C1-20	13	RX	DD
21	C1-21	13	RR	ID
22	C1-22	13	RX	II
23	C1-23	13	RR	ID
24	C1-24	13	XX	DD
25	C1-25	13	RX	DD
26	C1-26	13	RX	ID
27	C1-27	13	RR	ID
28	C1-28	13	RX	ID
29	C1-29	13	RR	II
30	C1-30	13	XX	ID
31	C1-31	13	XX	ID
32	C1-32	13	XX	DD
33	C1-33	13	XX	ID
34	C1-34	13	XX	II
35	C1-35	13	RX	II
36	C1-36	13	RX	DD
37	C1-37	13	XX	ID
38	C1-38	13	RX	II
39	C1-39	13	XX	ID
40	C1-40	13	RR	II
41	C1-41	13	XX	II
42	C1-42	13	RR	ID
43	C1-43	13	XX	ID
44	C1-44	13	XX	ID
45	C1-45	13	RX	ID
46	C1-46	13	XX	ID
47	C1-47	13	RX	II
48	C1-48	13	XX	DD
49	C1-49	13	XX	II
50	C1-50	13	RR	II
51	C1-51	13	XX	ID
52	C1-52	13	RX	ID
53	C1-53	13	RX	DD
54	C1-54	13	XX	II
55	C1-55	13	RX	ID
56	C1-56	13	RX	ID
57	C1-57	13	RX	II
58	C1-58	13	RX	ID
59	C1-59	13	RX	II
60	C1-60	13	RR	ID
61	C1-61	13	XX	ID
62	C1-62	13	XX	DD
63	C1-63	13	RR	DD
64	C2-1	14	RX	II
65	C2-2	14	RX	II
66	C2-3	14	XX	DD
67	C2-4	14	RX	ID
68	C2-5	14	RX	II
69	C2-6	14	XX	ID
70	C2-7	14	RX	II
71	C2-8	14	RR	DD
72	C2-9	14	RR	DD
73	C2-10	14	RR	ID
74	C2-11	14	RX	ID
75	C2-12	14	XX	DD
76	C2-13	14	RR	II
77	C2-14	14	RX	DD
78	C2-15	14	XX	II
79	C2-16	14	RX	II
80	C2-17	14	XX	DD
81	C2-18	14	RR	ID
82	C2-19	14	RX	II
83	C2-20	14	XX	II
84	C2-21	14	XX	DD
85	C2-22	14	XX	II
86	C2-23	14	RX	II
87	C2-24	14	XX	II
88	C2-25	14	XX	II
89	C2-26	14	RX	II
90	C2-27	14	RX	ID
91	C2-28	14	RX	II
92	C2-29	14	RR	DD
93	C2-30	14	XX	II
94	C2-31	14	RR	ID
95	C2-32	14	XX	ID
96	C2-33	14	RR	ID
97	C2-34	14	RX	II
98	C2-35	14	XX	ID
99	C2-36	14	RX	II
100	C2-37	14	XX	II
101	C2-38	14	RX	ID
102	C2-39	14	XX	ID
103	C2-40	14	RR	II
104	C2-41	14	XX	ID
105	C2-42	14	RX	II
106	C2-43	14	XX	ID
107	C2-44	14	XX	DD
